# Supplementary material for: Effect of Group Mixing and Available Space on Performance, Feeding Behavior, and Fecal Microbiota Composition during the Growth Period of Pigs
Source: MDPI journal article supplement (doi:10.3390/ani14182704), 2024-09-18

**Supplementary Figure S1.** Relative abundance across time-points of (A) Phylum, (B) Genus

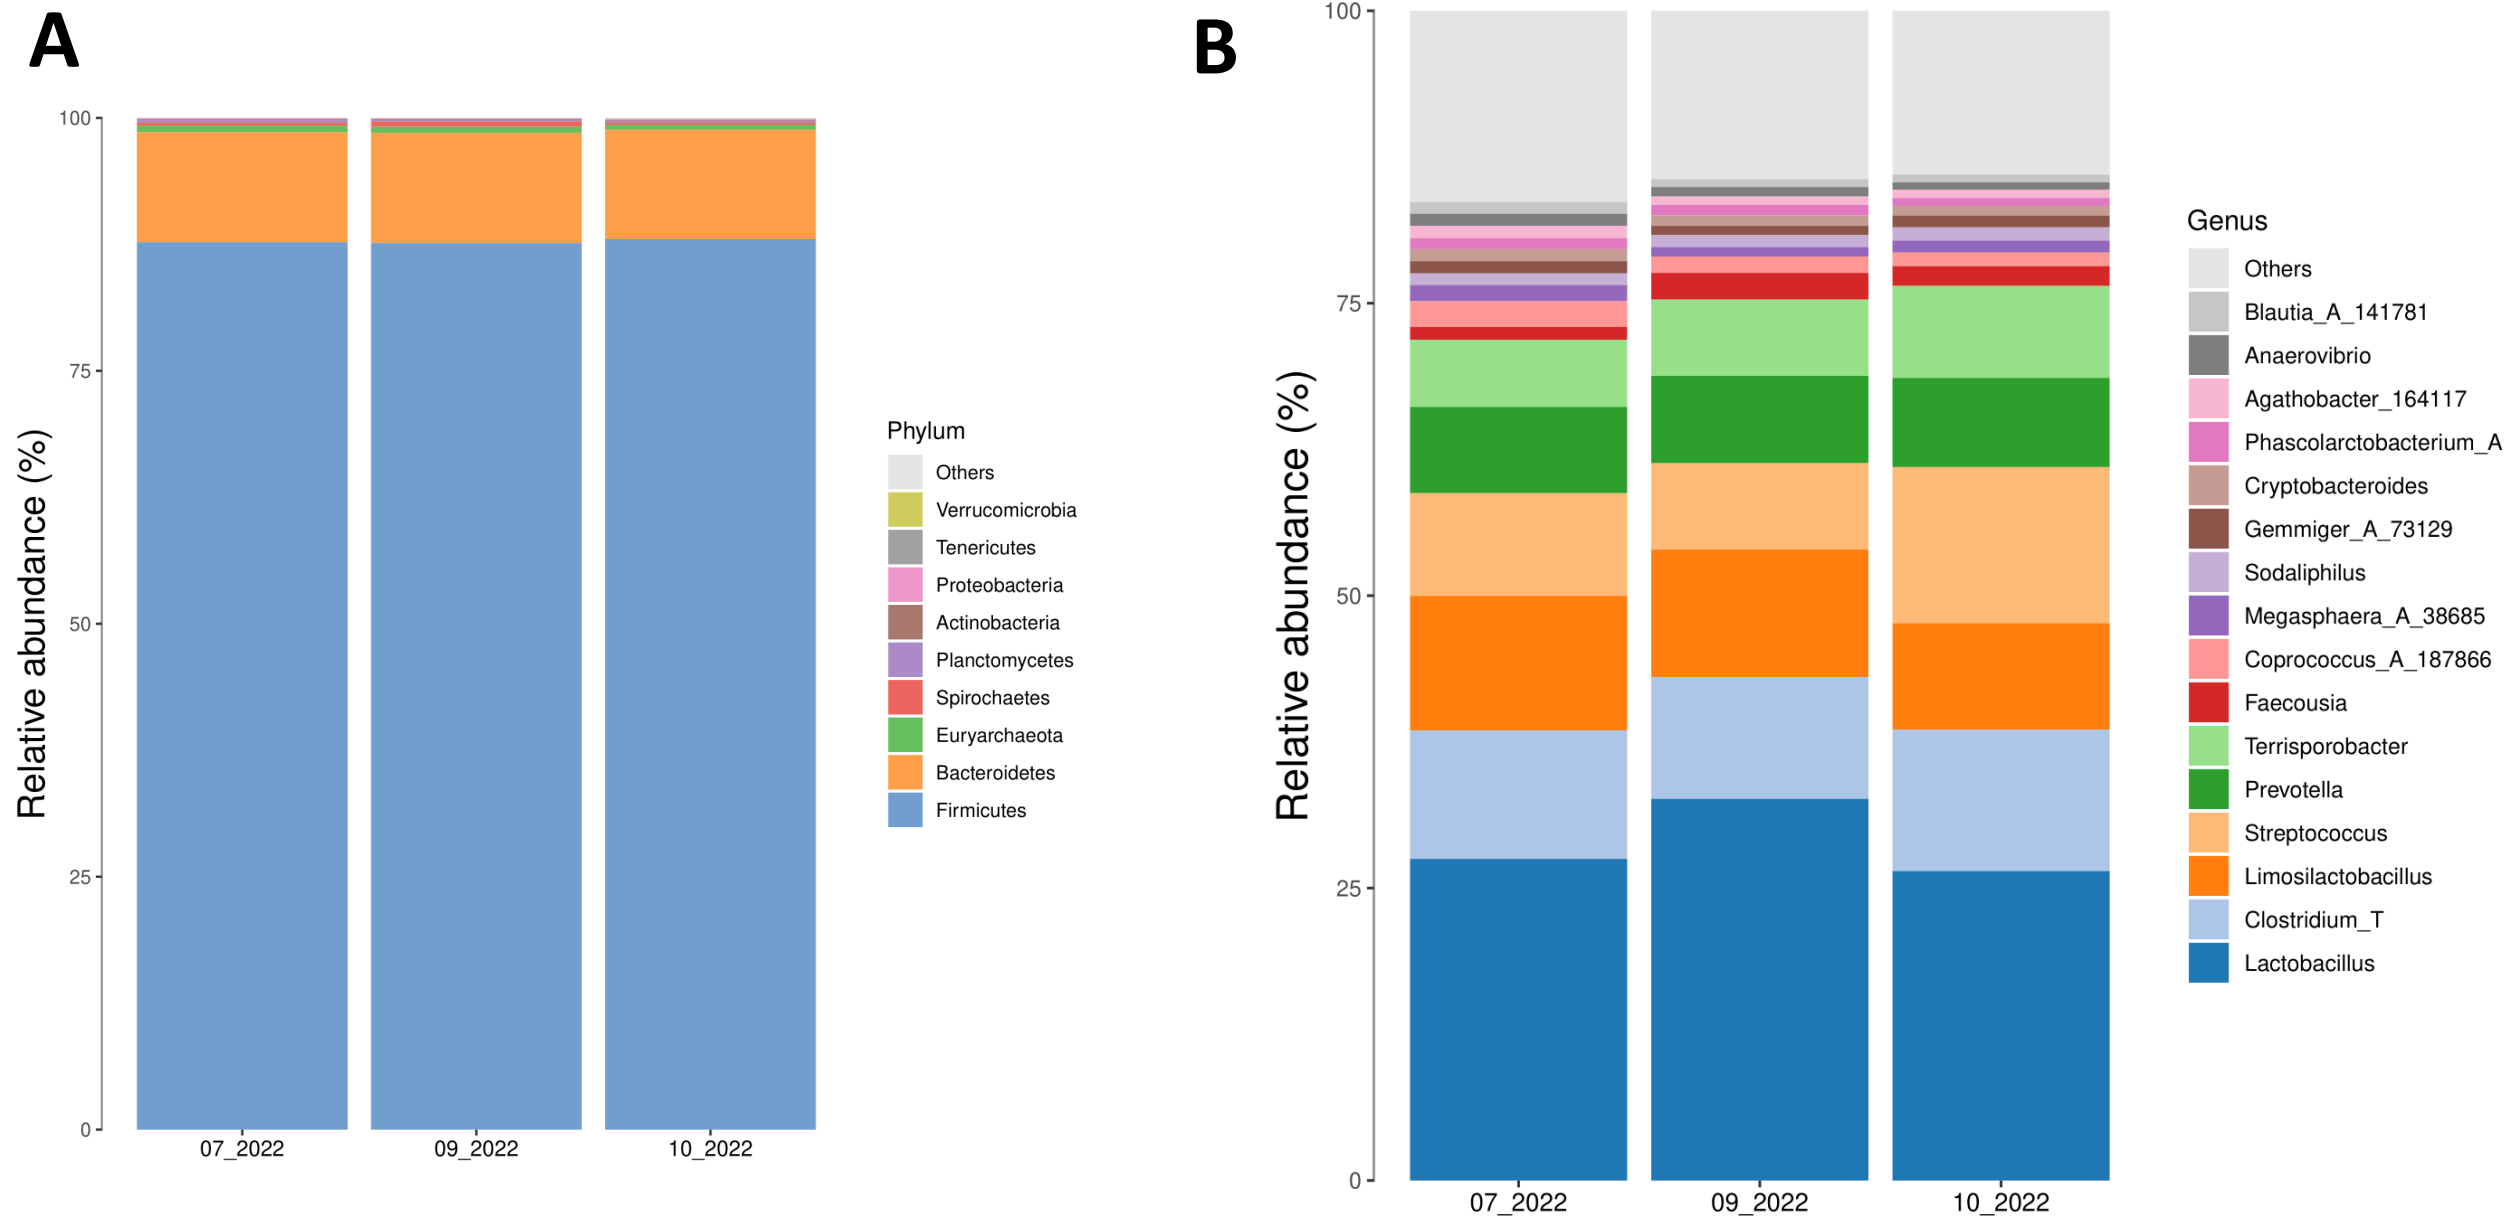

**Supplementary Figure S2.** Mean comparison of node degree between control and stress networks

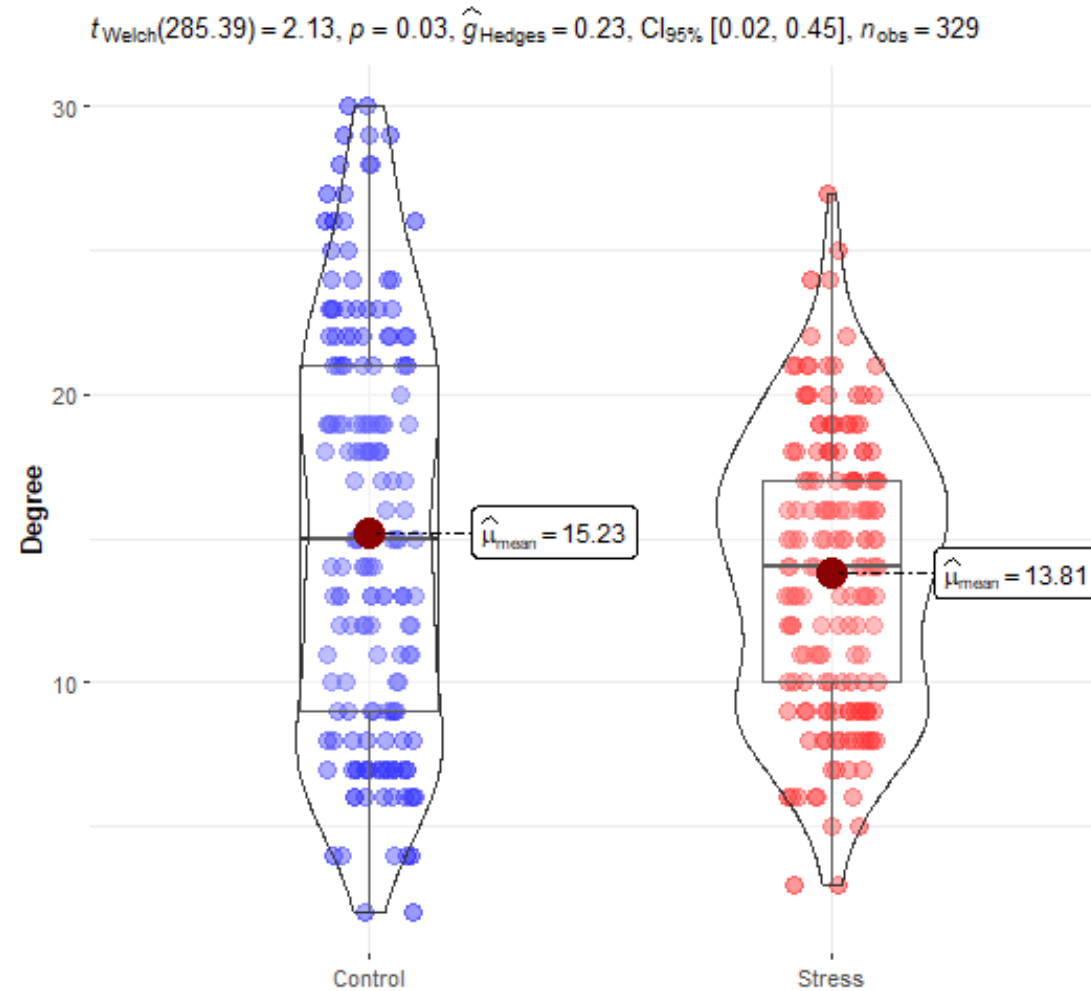

**Supplementary Figure S3.** Dynamic patterns of the clr-abundance of genera indicators of acute stress

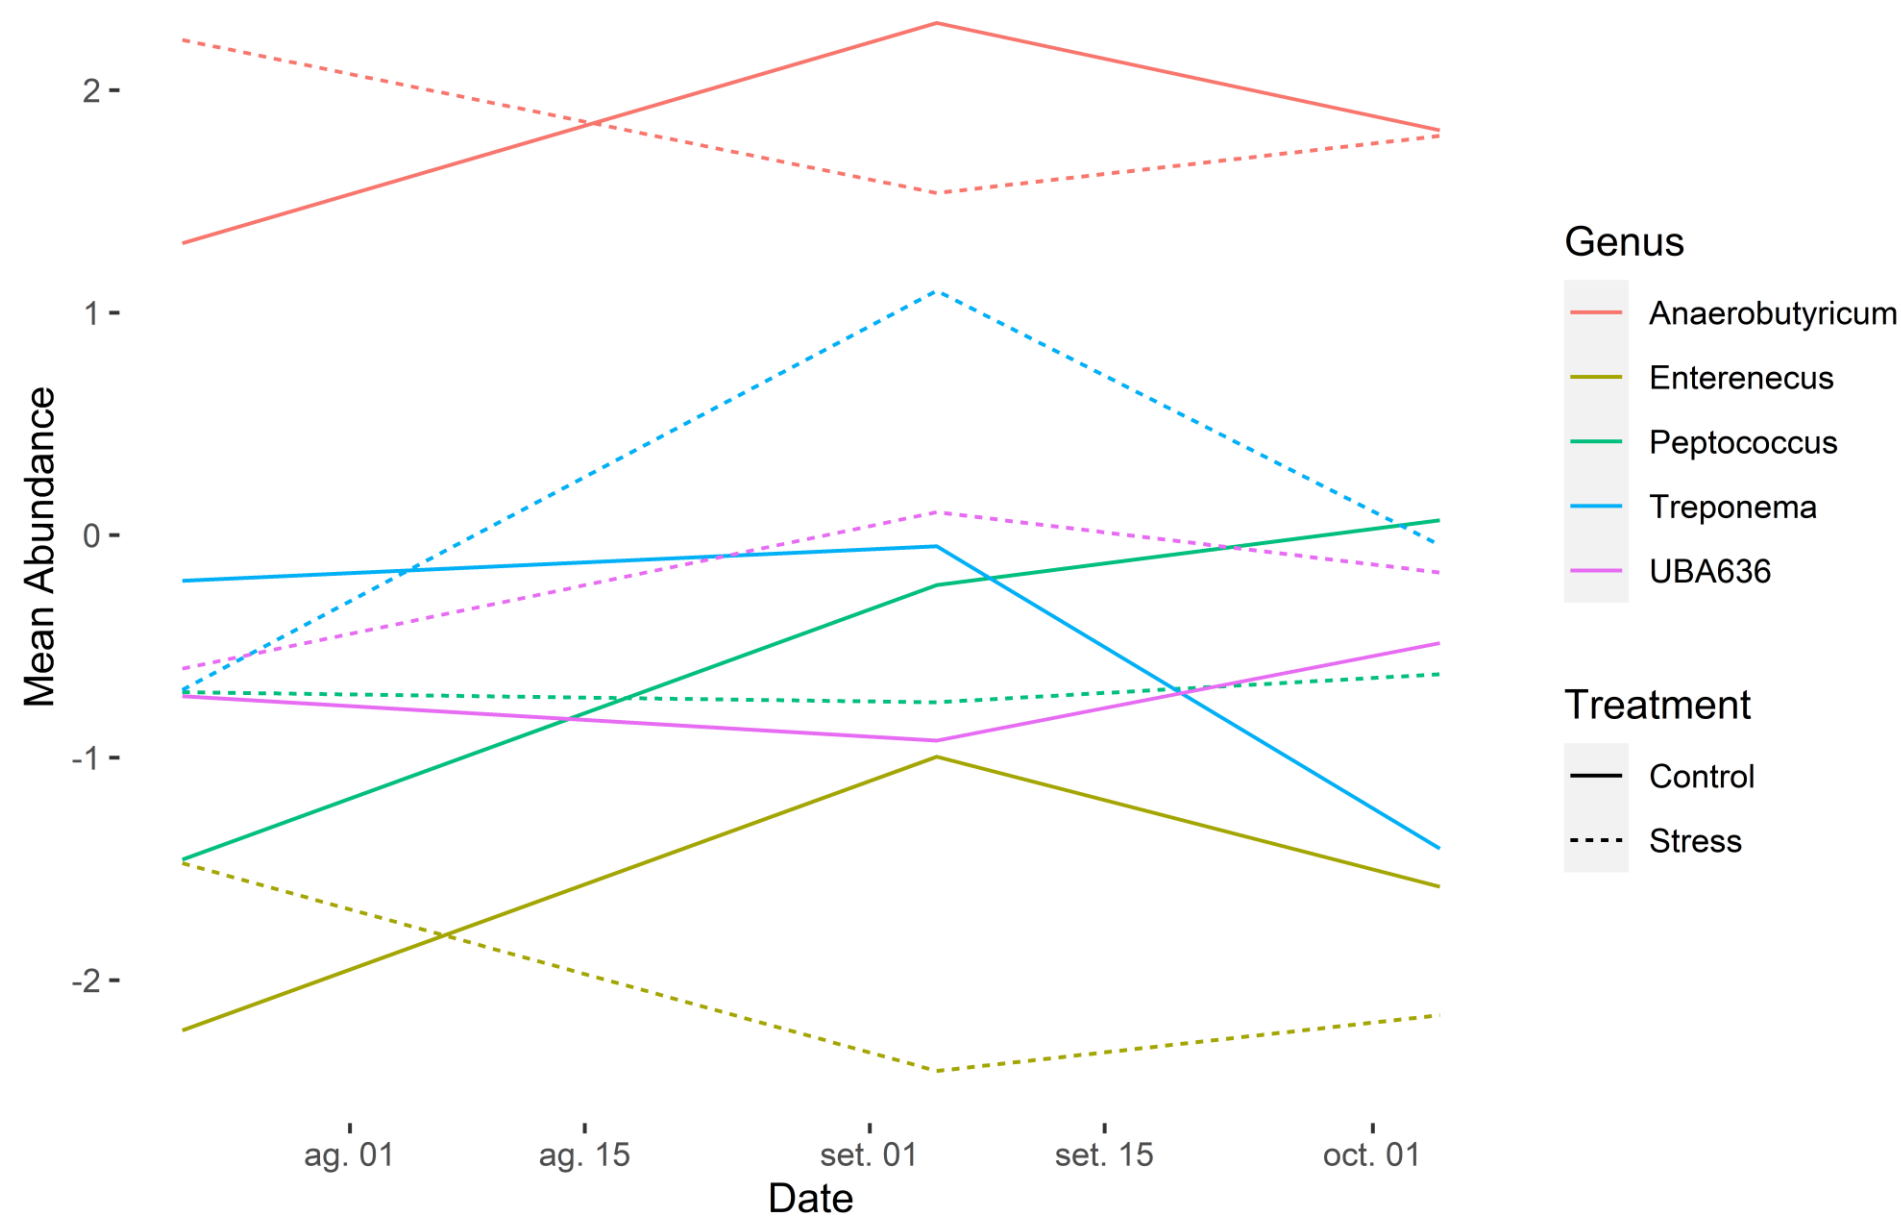

Supplement: s1 [file Supplementary_figures.pdf › Supplementary_figures.pdf]
